# Supplementary material for: Fe3O4@SiO2mesoporous spheres as Fe(ii) donors loaded with artemisinin and a photosensitizer to alleviate tumor hypoxia in PDT for enhanced anticancer therapy
Source: Royal Society of Chemistry journal article supplement (doi:10.1039/c9nj00974d), 2019-01-01
Supplement: c9nj00974d1.pdf [file c9nj00974d1.pdf]

## New journal of chemistry

### Supporting Information

$\text{Fe}_3\text{O}_4@\text{SiO}_2$  mesoporous spheres as a Fe (II) donor loaded with artemisinin and photosensitizer to alleviate tumor hypoxia in PDT for enhanced anticancer therapy

Xiang Qin, Hongyue Zhang, Zhiqiang Wang\*, and Yingxue Jin\*

Key Laboratory of Photochemistry biomaterials and Energy storage materials of Heilongjiang Province, Harbin Normal University, Harbin, 150025, China. E-mail: jyxprof@163.com, wzq70402@163.com; Tel: +86-0451-88060569.

### Results and discussion

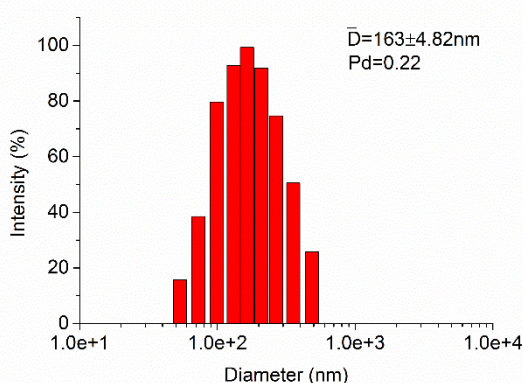

Figure S1. DLS pattern of  $\text{Fe}_3\text{O}_4@\text{SiO}_2$  nanoparticles in deionized water at 25 °C.

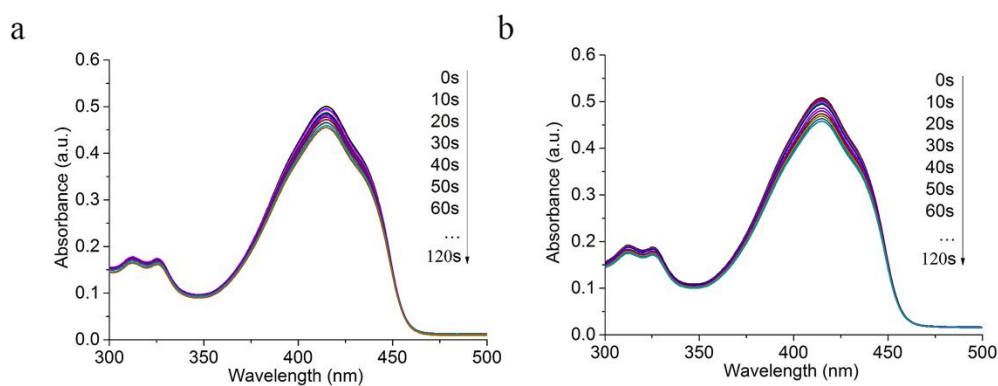

Figure S2. The UV-vis absorption of DPBF probe after irradiation of (a)  $\text{Fe}_3\text{O}_4@\text{SiO}_2$  and (b)  $\text{Fe}_3\text{O}_4@\text{SiO}_2\text{-ART}$  nanoparticles for different times.
